# Supplementary material
Source: PubMed Central journal article supplement (PMC9350926)
Supplement: NIHMS1815029-supplement-1.pdf [file NIHMS1815029-supplement-1.pdf]

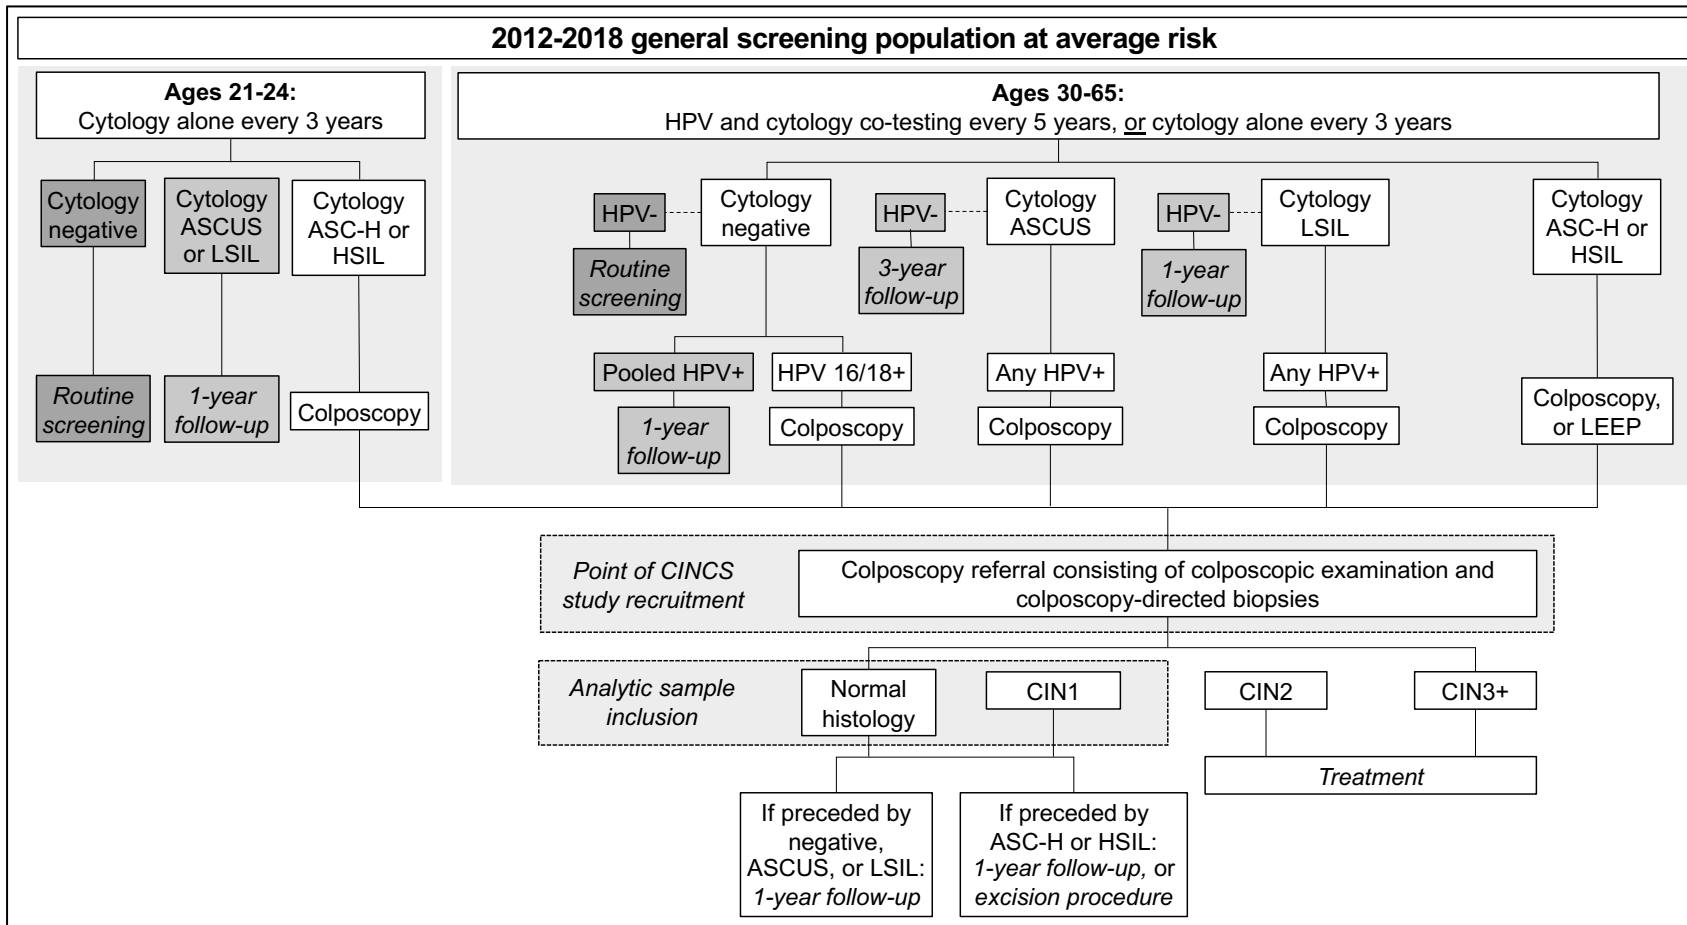

**Figure S1. Study setting: Simplified cervical cancer screening cascade according to 2012 ASCCP guidelines for the US general screening population.** Schematic produced based on the 2012 American Society for Colposcopy and Cervical Pathology (ASCCP) guidelines (Massad et al. 2012), representing a simplified initial screening cascade for average-risk individuals with no or unknown prior screening history. It is not exhaustive of all possible clinical scenarios, rather it describes the most common scenarios and their follow-up management through to colposcopy. Please see the following pages in Massad et al. (2012) for details: For women aged 30+ with negative cytology (p. S8, Fig 3), ASCUS (p. S9, Fig. 4), LSIL (p. S11, fig. 6), ASC-H (p. S12, Fig. 8), and HSIL (p. S13-S14, Fig. 10); for women aged 21-24 with ASCUS/LSIL (p. S10, Fig. 5) and ASC-H/HSIL (S13, Fig. 9). For those presenting to colposcopy with normal histology or CIN1 (p. S17-S18, Fig. 13-14) and with CIN2+ (p. S19, Fig. 16). For other special populations (ie, pregnant women or women with HIV), recommendations may vary; please see ASCCP guidelines. The 2019 ASCCP guidelines (Perkins et al., 2019) replace these 2012 guidelines, but the 2019 guidelines were not yet published during the CINCS study period. LEEP = Loop electrosurgical excisional procedure.
