# Supplementary material
Source: PubMed Central journal article supplement (PMC9350926)
Supplement: NIHMS1815029-supplement-2.pdf [file NIHMS1815029-supplement-2.pdf]

**Table S1. Comparison of enrollment characteristics of eligible participants by follow-up status**

| Enrollment characteristic                             |                              | ≥1 follow-up visit (n=343) | No follow-up visits (n=135) | p-value <sup>b</sup> |
|-------------------------------------------------------|------------------------------|----------------------------|-----------------------------|----------------------|
|                                                       |                              | N (%) <sup>a</sup>         | N (%) <sup>a</sup>          |                      |
| <b>Enrollment histology</b>                           |                              |                            |                             |                      |
|                                                       | Normal                       | 226 (65.9)                 | 99 (73.3)                   | 0.12                 |
|                                                       | CIN1                         | 117 (34.1)                 | 36 (26.7)                   |                      |
| <b>Age (years)</b>                                    |                              |                            |                             |                      |
|                                                       | <i>Median (Range)</i>        | <i>30.1 (21.0-72.2)</i>    | <i>29.2 (21.2-67.6)</i>     | 0.26                 |
|                                                       | 21-24                        | 75 (21.9)                  | 39 (28.9)                   |                      |
|                                                       | 25-29                        | 95 (27.7)                  | 33 (24.4)                   |                      |
|                                                       | 30+                          | 173 (50.4)                 | 63 (46.7)                   |                      |
|                                                       |                              |                            |                             |                      |
| <b>High-risk HPV</b>                                  |                              |                            |                             |                      |
|                                                       | Positive                     | 217 (63.3)                 | 83 (61.5)                   | 0.25                 |
|                                                       | Negative                     | 126 (36.7)                 | 52 (38.5)                   |                      |
| <b>Referral cytology</b>                              |                              |                            |                             |                      |
|                                                       | ASCUS                        | 92 (26.9)                  | 53 (39.3)                   | 0.20                 |
|                                                       | LSIL                         | 195 (57.0)                 | 64 (47.4)                   |                      |
|                                                       | ASC-H                        | 30 (8.8)                   | 9 (6.7)                     |                      |
|                                                       | LSIL-H                       | 12 (3.5)                   | 5 (3.7)                     |                      |
|                                                       | HSIL                         | 7 (2.0)                    | 2 (1.5)                     |                      |
|                                                       | Normal or Other <sup>c</sup> | 6 (1.7)                    | 2 (1.5)                     |                      |
| <b>Race/Ethnicity</b>                                 |                              |                            |                             |                      |
|                                                       | Black or African-American    | 157 (45.9)                 | 56 (41.8)                   | 0.96                 |
|                                                       | Non-Hispanic White           | 148 (43.3)                 | 56 (47.0)                   |                      |
|                                                       | Other <sup>d</sup>           | 37 (10.8)                  | 15 (11.2)                   |                      |
| <b>Currently smoking</b>                              |                              |                            |                             |                      |
|                                                       | No                           | 277 (81.0)                 | 107 (81.7)                  | 0.86                 |
|                                                       | Yes                          | 65 (19.0)                  | 24 (18.3)                   |                      |
| <b>Current hormonal contraceptive use<sup>e</sup></b> |                              |                            |                             |                      |
|                                                       | No                           | 251 (73.2)                 | 101 (74.8)                  | 0.71                 |
|                                                       | Yes                          | 92 (26.8)                  | 34 (25.2)                   |                      |
| <b>Parity</b>                                         |                              |                            |                             |                      |
|                                                       | Nulliparous                  | 152 (44.7)                 | 61 (46.9)                   | 0.85                 |
|                                                       | Primiparous (1)              | 84 (24.7)                  | 29 (22.3)                   |                      |
|                                                       | Multiparous (2+)             | 104 (30.6)                 | 40 (30.8)                   |                      |

<sup>a</sup> Numbers may not add up to total sample size due to missing data (referral cytology: n=1; race/ethnicity: n=2; current smoking: n=5; parity n=8). Percentages calculated as percent of non-missing.

<sup>b</sup> Chi-square test p-value, comparing those retained to those not retained.

<sup>c</sup> Other referral cytology includes unknown or inconclusive results.

<sup>d</sup> Participants self-classified race and ethnicity in multiple-choice question at enrollment; "Other" includes "Asian/Pacific Islander" and "Hispanic White".

<sup>e</sup> Hormonal contraceptives include oral, patch, injectable, and implant contraceptives.
