# Supplementary material
Source: PubMed Central journal article supplement (PMC9350926)
Supplement: NIHMS1815029-supplement-3.pdf [file NIHMS1815029-supplement-3.pdf]

**Table S2. Distribution of single- and multiple-type HPV infections at enrollment in 343 CINCS participants, stratified by enrollment histology**

| HPV genotype         | Normal Histology (n=226)    |                                   |                                     | CIN1 (n=117)                |                                   |                                     |
|----------------------|-----------------------------|-----------------------------------|-------------------------------------|-----------------------------|-----------------------------------|-------------------------------------|
|                      | Total<br>N (%) <sup>a</sup> | Single-type<br>infection<br>N (%) | Multiple-type<br>infection<br>N (%) | Total<br>N (%) <sup>a</sup> | Single-type<br>infection<br>N (%) | Multiple-type<br>infection<br>N (%) |
| <b>HPV-positive</b>  | 189 (83.6)                  | 105 (46.5)                        | 84 (37.2)                           | 112 (95.7)                  | 39 (33.3)                         | 73 (62.4)                           |
| <b>High-risk HPV</b> |                             |                                   |                                     |                             |                                   |                                     |
| Any type             | 133 (58.8)                  | 69 (30.5)                         | 69 (30.5)                           | 84 (71.8)                   | 26 (22.2)                         | 60 (51.3)                           |
| 16                   | 21 (9.3) <sup>b</sup>       | 13 (5.8)                          | 8 (3.5)                             | 15 (12.8) <sup>b</sup>      | 3 (2.6)                           | 12 (10.3)                           |
| 18                   | 12 (5.3)                    | 4 (1.8)                           | 8 (3.5)                             | 8 (6.8)                     | 2 (1.7)                           | 6 (5.1)                             |
| 31                   | 12 (5.3)                    | 7 (3.1)                           | 5 (2.2)                             | 7 (6.0)                     | 0 (0.0)                           | 7 (6.0)                             |
| 33                   | 5 (2.2)                     | 0 (0.0)                           | 5 (2.2)                             | 3 (2.6)                     | 1 (0.9)                           | 2 (1.7)                             |
| 35                   | 12 (5.3)                    | 8 (3.5)                           | 4 (1.8)                             | 5 (4.3)                     | 2 (1.7)                           | 3 (2.6)                             |
| 39                   | 14 (6.2)                    | 4 (1.8)                           | 10 (4.4)                            | 16 (13.7) <sup>b</sup>      | 3 (2.6)                           | 13 (11.1)                           |
| 45                   | 8 (3.5)                     | 4 (1.8)                           | 4 (1.8)                             | 5 (4.3)                     | 2 (1.7)                           | 3 (2.6)                             |
| 51                   | 23 (10.2) <sup>b</sup>      | 8 (3.5)                           | 15 (6.6)                            | 10 (8.5) <sup>b</sup>       | 0 (0.0)                           | 10 (8.5)                            |
| 52                   | 20 (8.8) <sup>b</sup>       | 9 (4.0)                           | 11 (4.9)                            | 9 (7.7)                     | 4 (3.4)                           | 5 (4.3)                             |
| 56                   | 9 (4.0)                     | 2 (0.9)                           | 7 (3.1)                             | 10 (8.5) <sup>b</sup>       | 1 (0.9)                           | 9 (7.7)                             |
| 58                   | 8 (3.5)                     | 2 (0.9)                           | 6 (2.7)                             | 10 (8.5) <sup>b</sup>       | 4 (3.4)                           | 6 (5.1)                             |
| 59                   | 17 (7.5)                    | 7 (3.1)                           | 10 (4.4)                            | 9 (7.7)                     | 1 (0.9)                           | 8 (6.8)                             |
| 68                   | 6 (2.7)                     | 1 (0.4)                           | 5 (2.2)                             | 10 (8.5) <sup>b</sup>       | 3 (2.6)                           | 7 (6.0)                             |
| <b>Low-risk HPV</b>  |                             |                                   |                                     |                             |                                   |                                     |
| Any type             | 106 (46.9)                  | 33 (14.6)                         | 73 (32.3)                           | 78 (66.7)                   | 13 (11.1)                         | 65 (55.6)                           |
| <b>HPV-negative</b>  | 37 (16.4)                   | --                                | --                                  | 5 (4.3)                     | --                                | --                                  |

<sup>a</sup> Percentages represent column percentages (denominators are N with normal histology and N with CIN1, respectively)

<sup>b</sup> Top 3 most prevalent high-risk HPV genotypes among normal histology and CIN1, respectively (or more, in case of a tie)
