# Supplementary material
Source: PubMed Central journal article supplement (PMC9350926)
Supplement: NIHMS1815029-supplement-4.pdf [file NIHMS1815029-supplement-4.pdf]

**Table S3. Incidence rates of CIN2+ by HPV genotype among 343 participants followed for up to 5 years, stratified by enrollment histology**

| HPV genotype <sup>a</sup>   | Normal Histology (n=226) |              |                            |                                      | CIN1 (n=117) |              |                            |                                      |
|-----------------------------|--------------------------|--------------|----------------------------|--------------------------------------|--------------|--------------|----------------------------|--------------------------------------|
|                             | N                        | CIN2+ events | Person-months <sup>b</sup> | Incidence rate (95% CI) <sup>c</sup> | N            | CIN2+ events | Person-months <sup>b</sup> | Incidence rate (95% CI) <sup>c</sup> |
| <b>Total HPV-positive</b>   | 189                      | 12           | 5294                       | 2.3 (1.3, 4.1)                       | 112          | 10           | 2917                       | 3.5 (1.9, 6.5)                       |
| <b>High-risk HPV</b>        |                          |              |                            |                                      |              |              |                            |                                      |
| Any type                    | 133                      | 10           | 3707                       | 2.7 (1.5, 5.1)                       | 84           | 10           | 2264                       | 4.5 (2.4, 8.4)                       |
| 16 <sup>d</sup>             | 21                       | 4            | 589                        | 7.4 (2.8, 19.8) <sup>e</sup>         | 15           | 4            | 438                        | 9.4 (3.5, 25.0) <sup>e</sup>         |
| 18/45 <sup>d</sup>          | 20                       | 1            | 664                        | 1.5 (0.2, 10.7)                      | 13           | 1            | 356                        | 2.9 (0.4, 20.5)                      |
| 31/33/35/52/58 <sup>d</sup> | 55                       | 4            | 1476                       | 2.7 (1.0, 7.3)                       | 31           | 4            | 781                        | 5.2 (2.0, 14.0)                      |
| 39/51/56/59/68 <sup>d</sup> | 61                       | 4            | 1663                       | 2.4 (0.9, 6.4)                       | 45           | 4            | 1237                       | 3.3 (1.2, 8.8)                       |
| 18                          | 12                       | 1            | 420                        | 2.4 (0.3, 17.0)                      | 8            | 1            | 213                        | 4.9 (0.7, 34.9)                      |
| 31                          | 12                       | 0            | 334                        | 0.0 (0.0, 11.0)                      | 7            | 1            | 103                        | 10.2 (1.4, 72.2) <sup>e</sup>        |
| 33                          | 5                        | 1            | 197                        | 5.2 (0.7, 36.6) <sup>e</sup>         | 3            | 1            | 68                         | 16.3 (2.3, 116.0) <sup>e</sup>       |
| 35                          | 12                       | 1            | 284                        | 3.5 (0.5, 25.2)                      | 5            | 0            | 117                        | 0.0 (0.0, 31.5)                      |
| 39                          | 14                       | 1            | 312                        | 3.2 (0.5, 23.0)                      | 16           | 2            | 400                        | 5.1 (1.3, 20.5)                      |
| 45                          | 8                        | 0            | 244                        | 0.0 (0.0, 15.1)                      | 5            | 0            | 143                        | 0.0 (0.0, 25.8)                      |
| 51                          | 23                       | 2            | 646                        | 3.1 (0.8, 12.4)                      | 10           | 1            | 272                        | 3.9 (0.5, 27.6)                      |
| 52                          | 20                       | 2            | 523                        | 3.9 (1.0, 15.6)                      | 9            | 1            | 317                        | 3.2 (0.4, 22.4)                      |
| 56                          | 9                        | 1            | 315                        | 3.2 (0.4, 22.7)                      | 10           | 0            | 263                        | 0.0 (0.0, 14.0)                      |
| 58                          | 8                        | 0            | 195                        | 0.0 (0.0, 18.9)                      | 10           | 2            | 224                        | 9.4 (2.3, 37.5) <sup>e</sup>         |
| 59                          | 17                       | 0            | 504                        | 0.0 (0.0, 7.3)                       | 9            | 1            | 258                        | 4.0 (0.6, 28.2)                      |
| 68                          | 6                        | 1            | 157                        | 6.4 (0.9, 45.4) <sup>e</sup>         | 10           | 0            | 308                        | 0.0 (0.0, 12.0)                      |
| <b>Low-risk HPV only</b>    | 53                       | 2            | 1558                       | 1.3 (0.3, 5.2)                       | 28           | 0            | 652                        | 0.0 (0.0, 5.7)                       |
| <b>HPV-negative</b>         | 37                       | 2            | 936                        | 2.2 (0.5, 8.6)                       | 5            | 0            | 170                        | 0.0 (0.0, 21.7)                      |

<sup>a</sup> Includes both single- and multiple-type HPV infections (ie, for multiple types, progression events count towards all individual types present at enrollment)

<sup>b</sup> Sum of person-months for all participants in group infected with noted genotype at enrollment; overall median follow-up time per person: 24.3 months

<sup>c</sup> Incidence rate per 1000 person-months (95% CI = 95% confidence interval); estimated with exponential accelerated failure time models for interval-censored data; for genotypes with zero events, estimated with Poisson exact method

<sup>d</sup> HPV risk stratification groups from Demarco et al. (2020)

<sup>e</sup> Highest three incidence rates for an individual HPV genotype among each group
