# Supplementary material
Source: PubMed Central journal article supplement (PMC9350926)
Supplement: NIHMS1815029-supplement-5.pdf [file NIHMS1815029-supplement-5.pdf]

**Table S4. Incidence rates of CIN2+ among 144 participants with single-type HPV infections only followed for up to 5 years, stratified by enrollment histology**

| HPV genotype                | Normal Histology (n=105) |              |                            |                                      | CIN1 (n=39) |              |                            |                                      |
|-----------------------------|--------------------------|--------------|----------------------------|--------------------------------------|-------------|--------------|----------------------------|--------------------------------------|
|                             | N                        | CIN2+ events | Person-months <sup>a</sup> | Incidence rate (95% CI) <sup>b</sup> | N           | CIN2+ events | Person-months <sup>a</sup> | Incidence rate (95% CI) <sup>b</sup> |
| <b>Total HPV-positive</b>   | 105                      | 5            | 2866                       | 1.8 (0.7, 4.2)                       | 39          | 2            | 1016                       | 2.0 (0.5, 8.0)                       |
| <b>High-risk HPV</b>        |                          |              |                            |                                      |             |              |                            |                                      |
| Any single type             | 69                       | 3            | 1915                       | 1.6 (0.5, 4.9)                       | 26          | 2            | 730                        | 2.8 (0.7, 11.2)                      |
| 16 <sup>c</sup>             | 13                       | 1            | 381                        | 2.7 (0.4, 19.5) <sup>d</sup>         | 3           | 1            | 51                         | 22.9 (3.2, 163.8) <sup>d</sup>       |
| 18/45 <sup>c</sup>          | 8                        | 0            | 256                        | 0.0 (0.0, 14.4)                      | 4           | 0            | 120                        | 0.0 (0.0, 30.7)                      |
| 31/33/35/52/58 <sup>c</sup> | 26                       | 1            | 671                        | 1.5 (0.2, 10.6)                      | 11          | 1            | 327                        | 3.1 (0.4, 22.1)                      |
| 39/51/56/59/68 <sup>c</sup> | 22                       | 1            | 607                        | 1.6 (0.2, 11.7)                      | 8           | 0            | 231                        | 0.0 (0.0, 16.0)                      |
| 18                          | 4                        | 0            | 128                        | 0.0 (0.0, 28.9)                      | 2           | 0            | 48                         | 0.0 (0.0, 77.4)                      |
| 31                          | 7                        | 0            | 150                        | 0.0 (0.0, 24.6)                      | 0           | --           | --                         | --                                   |
| 33                          | 0                        | --           | --                         | --                                   | 1           | 1            | 30                         | --                                   |
| 35                          | 8                        | 1            | 181                        | 5.6 (0.8, 39.7) <sup>d</sup>         | 2           | 0            | 30                         | 0.0 (0.0, 121.9)                     |
| 39                          | 4                        | 0            | 85                         | 0.0 (0.0, 43.2)                      | 3           | 0            | 40                         | 0.0 (0.0, 92.1)                      |
| 45                          | 4                        | 0            | 128                        | 0.0 (0.0, 28.8)                      | 2           | 0            | 72                         | 0.0 (0.0, 50.9)                      |
| 51                          | 8                        | 1            | 206                        | 4.9 (0.7, 34.5) <sup>d</sup>         | 0           | --           | --                         | --                                   |
| 52                          | 9                        | 0            | 298                        | 0.0 (0.0, 12.4)                      | 4           | 0            | 155                        | 0.0 (0.0, 23.9)                      |
| 56                          | 2                        | 0            | 68                         | 0.0 (0.0, 54.5)                      | 1           | 0            | 8                          | 0.0 (0.0, 454.6)                     |
| 58                          | 2                        | 0            | 42                         | 0.0 (0.0, 88.5)                      | 4           | 0            | 112                        | 0.0 (0.0, 32.9)                      |
| 59                          | 7                        | 0            | 190                        | 0.0 (0.0, 19.4)                      | 1           | 0            | 41                         | 0.0 (0.0, 90.9)                      |
| 68                          | 1                        | 0            | 58                         | 0.0 (0.0, 63.9)                      | 3           | 0            | 142                        | 0.0 (0.0, 25.9)                      |
| <b>Low-risk HPV</b>         |                          |              |                            |                                      |             |              |                            |                                      |
| Any single type             | 33                       | 2            | 922                        | 2.2 (0.6, 8.8)                       | 13          | 0            | 286                        | 0.0 (0.0, 12.9)                      |

<sup>a</sup> Sum of person-months for those in group infected with noted genotype at enrollment; overall median follow-up time per person: 24.3 months

<sup>b</sup> Incidence rate per 1000 person-months (95% CI = 95% confidence interval); estimated with exponential accelerated failure time models for interval-censored data; for genotypes with zero events, estimated with Poisson exact method

<sup>c</sup> HPV risk stratification groups from Demarco et al. (2020)

<sup>d</sup> Highest three incidence rates for an individual HPV genotype among each group
