# Supplementary material
Source: PubMed Central journal article supplement (PMC9350926)
Supplement: NIHMS1815029-supplement-6.pdf [file NIHMS1815029-supplement-6.pdf]

**Table S5. Incidence rates of CIN2+ among 343 participants followed for up to 5 years, assessed using different age cut-offs**

| HPV genotype <sup>a</sup>   | Ages 21+ (n=343) |                            |                                      | Ages 25+ (n=268) |                            |                                      | Ages 30+ (n=173) |                            |                                      |
|-----------------------------|------------------|----------------------------|--------------------------------------|------------------|----------------------------|--------------------------------------|------------------|----------------------------|--------------------------------------|
|                             | CIN2+ events     | Person-months <sup>b</sup> | Incidence rate (95% CI) <sup>c</sup> | CIN2+ events     | Person-months <sup>b</sup> | Incidence rate (95% CI) <sup>c</sup> | CIN2+ events     | Person-months <sup>b</sup> | Incidence rate (95% CI) <sup>c</sup> |
| <b>Total HPV-positive</b>   | 22               | 8210                       | 2.7 (1.8, 4.1)                       | 16               | 6381                       | 2.5 (1.6, 4.1)                       | 13               | 4071                       | 3.2 (1.9, 5.6)                       |
| <b>High-risk HPV</b>        |                  |                            |                                      |                  |                            |                                      |                  |                            |                                      |
| Any type                    | 20               | 5972                       | 3.4 (2.2, 5.3)                       | 15               | 4636                       | 3.3 (2.0, 5.5)                       | 12               | 2747                       | 4.5 (2.5, 7.8)                       |
| 16 <sup>d</sup>             | 8                | 1027                       | 8.3 (4.1, 16.6) <sup>e</sup>         | 5                | 688                        | 7.6 (3.2, 18.3) <sup>e</sup>         | 4                | 388                        | 11.1 (4.2, 29.6) <sup>e</sup>        |
| 18/45 <sup>d</sup>          | 2                | 1020                       | 2.0 (0.5, 7.9)                       | 2                | 930                        | 2.2 (0.5, 8.7)                       | 1                | 493                        | 2.0 (0.3, 14.5)                      |
| 31/33/35/52/58 <sup>d</sup> | 8                | 2257                       | 3.6 (1.8, 7.2)                       | 8                | 1753                       | 4.6 (2.3, 9.3)                       | 6                | 1109                       | 5.5 (2.5, 12.3)                      |
| 39/51/56/59/68 <sup>d</sup> | 8                | 2901                       | 2.8 (1.4, 5.6)                       | 6                | 2123                       | 2.8 (1.3, 6.3)                       | 4                | 1242                       | 3.2 (1.2, 8.6)                       |
| 18                          | 2                | 633                        | 3.2 (0.8, 12.9)                      | 2                | 613                        | 3.3 (0.8, 13.3)                      | 1                | 379                        | 2.6 (0.4, 18.8)                      |
| 31                          | 1                | 437                        | 2.3 (0.3, 16.4)                      | 1                | 298                        | 3.4 (0.5, 24.1)                      | 1                | 146                        | 7.1 (1.0, 50.1)                      |
| 33 <sup>f</sup>             | 2                | 265                        | 7.8 (2.0, 31.3) <sup>e</sup>         | 2                | 227                        | 9.2 (2.3, 36.7) <sup>e</sup>         | 1                | 221                        | 4.7 (0.7, 33.0)                      |
| 35                          | 1                | 401                        | 2.5 (0.4, 17.8)                      | 1                | 265                        | 3.8 (0.5, 27.0)                      | 1                | 175                        | 5.8 (0.8, 41.0)                      |
| 39                          | 3                | 712                        | 4.3 (1.4, 13.3)                      | 2                | 462                        | 4.4 (1.1, 17.5)                      | 1                | 251                        | 4.0 (0.6, 28.5)                      |
| 45                          | 0                | 387                        | 0.0 (0.0, 9.5)                       | 0                | 317                        | 0.0 (0.0, 11.6)                      | 0                | 114                        | 0.0 (0.0, 32.5)                      |
| 51                          | 3                | 918                        | 3.3 (1.1, 10.3)                      | 2                | 700                        | 2.9 (0.7, 11.5)                      | 2                | 501                        | 4.0 (1.0, 16.1)                      |
| 52                          | 3                | 840                        | 3.6 (1.2, 11.2)                      | 3                | 728                        | 4.2 (1.3, 13.0)                      | 3                | 491                        | 6.2 (2.0, 19.3)                      |
| 56                          | 1                | 578                        | 1.7 (0.2, 12.3)                      | 1                | 422                        | 2.4 (0.3, 16.9)                      | 1                | 305                        | 3.3 (0.5, 23.4)                      |
| 58                          | 2                | 420                        | 4.9 (1.2, 19.6) <sup>e</sup>         | 2                | 306                        | 6.8 (1.7, 27.1) <sup>e</sup>         | 1                | 139                        | 7.5 (1.1, 53.0) <sup>e</sup>         |
| 59                          | 1                | 763                        | 1.3 (0.2, 9.4)                       | 1                | 669                        | 1.5 (0.2, 10.7)                      | 0                | 365                        | 0.0 (0.0, 10.1)                      |
| 68                          | 1                | 466                        | 2.2 (0.3, 15.3)                      | 1                | 268                        | 3.8 (0.5, 26.6)                      | 1                | 51                         | 20.2 (2.8, 143.3) <sup>e</sup>       |
| <b>Low-risk HPV only</b>    | 2                | 2210                       | 0.9 (0.2, 3.6)                       | 1                | 1716                       | 0.6 (0.1, 4.2)                       | 1                | 1295                       | 0.8 (0.1, 5.5)                       |
| <b>HPV-negative</b>         | 2                | 1106                       | 1.8 (0.5, 7.3)                       | 2                | 1046                       | 1.9 (0.5, 7.7)                       | 1                | 858                        | 1.2 (0.2, 8.3)                       |

<sup>a</sup> Includes both single- and multiple-type HPV infections (ie, for multiple types, progression events count towards all individual types present at enrollment)

<sup>b</sup> Sum of person-months for all participants in group infected with noted genotype at enrollment

<sup>c</sup> Incidence rate per 1000 person-months (95% CI = 95% confidence interval); estimated with exponential accelerated failure time models for interval-censored data; for genotypes with zero events, estimated with Poisson exact method

<sup>d</sup> HPV risk stratification groups from Demarco et al. (2020)

<sup>e</sup> Highest three incidence rates by individual HPV type

<sup>f</sup> N<10 participants "exposed" or infected with HPV type overall
