# Supplementary material
Source: PubMed Central journal article supplement (PMC9350926)
Supplement: NIHMS1815029-supplement-7.pdf [file NIHMS1815029-supplement-7.pdf]

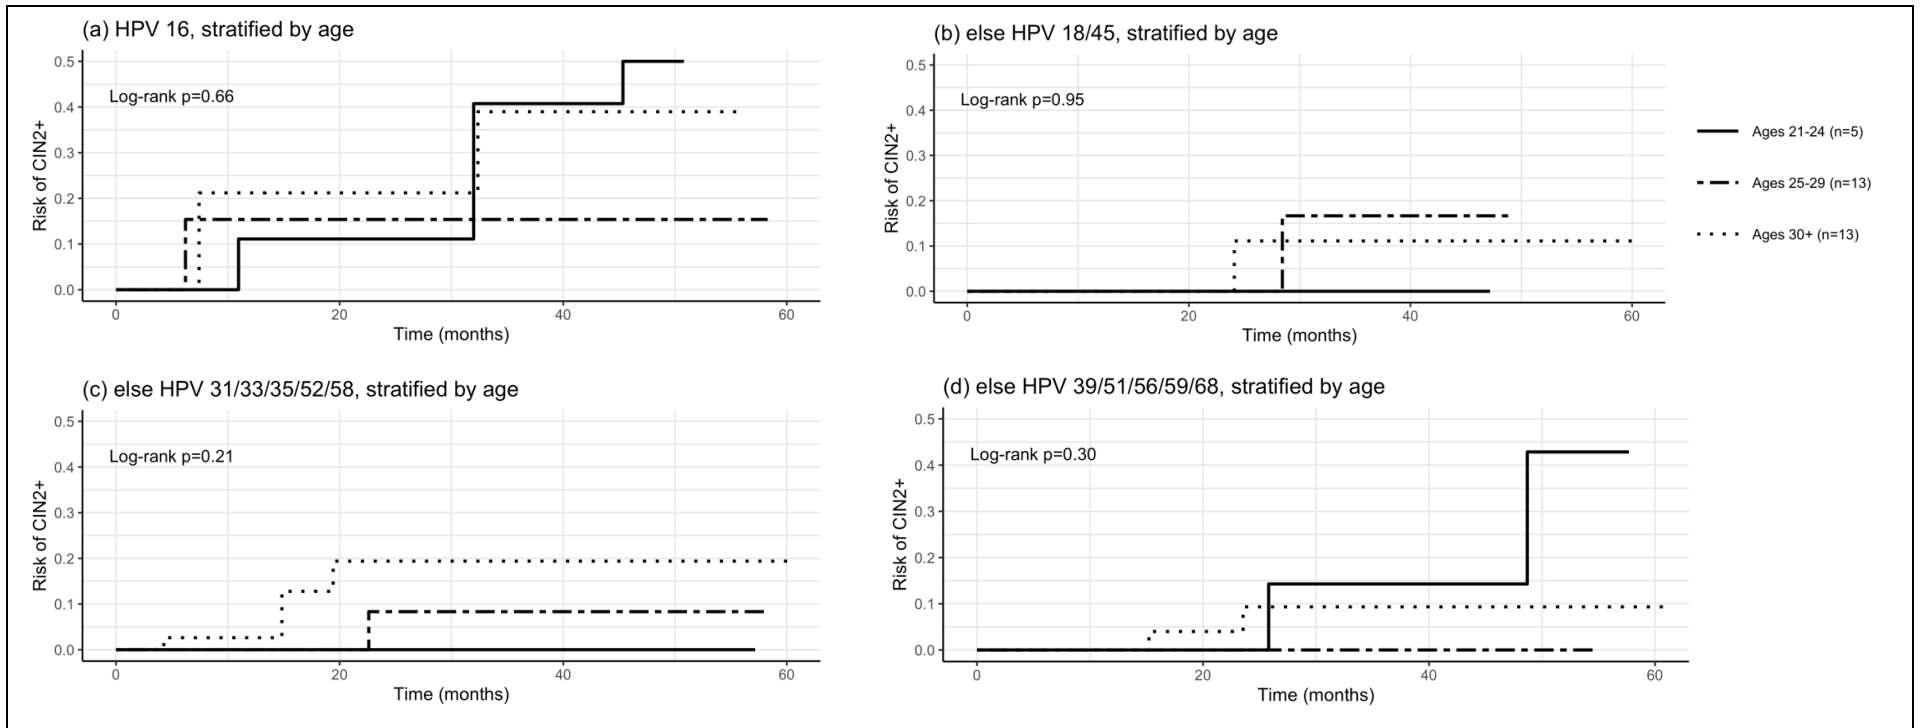

**Figure S2. Five-year risk of progression to CIN2+ by HPV risk group among CINCS participants with normal or CIN1 enrollment histology, stratified by age.** HPV risk stratification groups from Demarco et al. (2020). Five-year cumulative probability (risk) of CIN2+ for each age group (21-24 years, 25-29 years, and 30+ years, respectively): a.) HPV 16 (0.50, 0.15, and 0.39); b.) else HPV 18/45 (0.00, 0.17, and 0.11); c.) else HPV 31/33/35/52/58 (0.00, 0.08, and 0.19); and d.) else HPV 39/51/56/59/68 (0.43, 0.00, and 0.09).
