# Supplementary material
Source: PubMed Central journal article supplement (PMC9350926)
Supplement: NIHMS1815029-supplement-8.pdf [file NIHMS1815029-supplement-8.pdf]

**Table S6. Sensitivity analysis results: HPV type distribution, incidence rates, and five-year risks using different eligibility criteria (Analysis 1) and different outcome assessment (Analysis 2)**

| HPV genotype              | Sensitivity Analysis 1:<br>LSIL or ASCUS enrollment cytology only (n=287) <sup>a</sup> |                                         |                                                         |                     | Sensitivity Analysis 2:<br>Histologically confirmed CIN2+ cases only (n=340) <sup>b</sup> |                                         |                                                         |                     |
|---------------------------|----------------------------------------------------------------------------------------|-----------------------------------------|---------------------------------------------------------|---------------------|-------------------------------------------------------------------------------------------|-----------------------------------------|---------------------------------------------------------|---------------------|
|                           | N (%)                                                                                  | Incidence rate<br>(95% CI) <sup>c</sup> | Hierarchical<br>group-wise<br>5-year risks <sup>d</sup> | Log-rank<br>p-value | N (%)                                                                                     | Incidence rate<br>(95% CI) <sup>c</sup> | Hierarchical<br>group-wise<br>5-year risks <sup>d</sup> | Log-rank<br>p-value |
| <b>Total HPV-positive</b> | 258 (89.9)                                                                             | 2.1 (1.3, 3.5)                          |                                                         |                     | 298 (87.6)                                                                                | 2.4 (1.5, 3.7)                          |                                                         |                     |
| <b>High-risk HPV</b>      |                                                                                        |                                         |                                                         |                     |                                                                                           |                                         |                                                         |                     |
| Any type                  | 184 (64.1)                                                                             | 2.8 (1.6, 4.7)                          |                                                         |                     | 215 (63.2)                                                                                | 3.1 (2.0, 4.9)                          |                                                         |                     |
| 16                        | 28 (9.8) <sup>e</sup>                                                                  | 8.0 (3.6, 17.9) <sup>e</sup>            | 0.34                                                    | 0.04                | 36 (10.6) <sup>e</sup>                                                                    | 8.3 (4.1, 16.6) <sup>e</sup>            | 0.34                                                    | 0.02                |
| 18/45                     | 29 (10.1)                                                                              | 1.2 (0.2, 8.3)                          | 0.07                                                    |                     | 33 (9.7)                                                                                  | 2.0 (0.5, 7.9)                          | 0.12                                                    |                     |
| 31/33/35/52/58            | 70 (24.4)                                                                              | 2.6 (1.1, 6.4)                          | 0.11                                                    |                     | 84 (24.7)                                                                                 | 2.7 (1.2, 6.1)                          | 0.08                                                    |                     |
| 39/51/56/59/68            | 96 (33.4)                                                                              | 2.3 (1.0, 5.0)                          | 0.15                                                    |                     | 106 (31.1)                                                                                | 2.8 (1.4, 5.6)                          | 0.16                                                    |                     |
| 18                        | 17 (5.9)                                                                               | 2.0 (0.3, 14.3)                         |                                                         |                     | 20 (5.9)                                                                                  | 3.2 (0.8, 12.9)                         |                                                         |                     |
| 31                        | 17 (5.9)                                                                               | 2.6 (0.4, 18.2)                         |                                                         |                     | 19 (5.6)                                                                                  | 2.3 (0.3, 16.4)                         |                                                         |                     |
| 33                        | 7 (2.4)                                                                                | 4.0 (0.6, 28.1) <sup>e</sup>            |                                                         |                     | 7 (2.1)                                                                                   | 4.3 (0.6, 30.7) <sup>e</sup>            |                                                         |                     |
| 35                        | 12 (4.2)                                                                               | 0.0 (0.0, 13.9)                         |                                                         |                     | 17 (5.0)                                                                                  | 2.5 (0.4, 17.8)                         |                                                         |                     |
| 39                        | 28 (9.8) <sup>e</sup>                                                                  | 3.1 (0.8, 12.4)                         |                                                         |                     | 30 (8.8) <sup>e</sup>                                                                     | 4.3 (1.4, 13.3) <sup>e</sup>            |                                                         |                     |
| 45                        | 12 (4.2)                                                                               | 0.0 (0.0, 10.1)                         |                                                         |                     | 13 (3.8)                                                                                  | 0.0 (0.0, 9.5)                          |                                                         |                     |
| 51                        | 30 (10.5) <sup>e</sup>                                                                 | 2.5 (0.6, 9.8)                          |                                                         |                     | 33 (9.7) <sup>e</sup>                                                                     | 3.3 (1.1, 10.3)                         |                                                         |                     |
| 52                        | 24 (8.4)                                                                               | 2.8 (0.7, 11.1)                         |                                                         |                     | 28 (8.2)                                                                                  | 2.4 (0.6, 9.8)                          |                                                         |                     |
| 56                        | 16 (5.6)                                                                               | 1.9 (0.3, 13.8)                         |                                                         |                     | 19 (5.6)                                                                                  | 1.7 (0.2, 12.3)                         |                                                         |                     |
| 58                        | 15 (5.2)                                                                               | 5.6 (1.4, 22.2) <sup>e</sup>            |                                                         |                     | 18 (5.3)                                                                                  | 4.9 (1.2, 19.6) <sup>e</sup>            |                                                         |                     |
| 59                        | 24 (8.4)                                                                               | 1.4 (0.2, 9.9)                          |                                                         |                     | 26 (7.6)                                                                                  | 1.3 (0.2, 9.4)                          |                                                         |                     |
| 68                        | 14 (4.9)                                                                               | 2.5 (0.4, 17.7)                         |                                                         |                     | 16 (4.7)                                                                                  | 2.2 (0.3, 15.3)                         |                                                         |                     |
| <b>Low-risk HPV only</b>  | 73 (25.4)                                                                              | 0.5 (0.1, 3.7)                          |                                                         |                     | 80 (23.5)                                                                                 | 0.5 (0.1, 3.3)                          |                                                         |                     |
| <b>HPV-negative</b>       | 29 (10.1)                                                                              | 2.7 (0.7, 10.9)                         |                                                         |                     | 42 (12.4)                                                                                 | 1.8 (0.5, 7.3)                          |                                                         |                     |

<sup>a</sup> Sensitivity Analysis 1: LSIL n=195, ASCUS n=92; median follow-up time: 24.2 months; 17 progression events overall

<sup>b</sup> Sensitivity Analysis 2: median follow-up time: 24.6 months; 17 progression events overall

<sup>c</sup> Incidence rate per 1000 person-months; estimated with exponential accelerated failure time models for interval-censored data; for genotypes with zero events, estimated with Poisson exact method

<sup>d</sup> Using hierarchical HPV risk groups from Demarco et al. (2020): HPV 16, else HPV 18/45, else HPV 31/33/35/52/58, and else HPV 39/51/56/59/68; risks estimated with Turnbull's nonparametric estimator for interval-censored data. For comparison, main analysis group-wise 5-year risks were 0.34, 0.12, 0.12, and 0.16, respectively (p=0.05)

<sup>e</sup> Top 3 HPV types with highest frequency or incidence rate, as applicable (or more, in case of a tie)
